# Supplementary material for: Resolving dynamics and function of transient states in single enzyme molecules
Source: PubMed Central journal article supplement (PMC7060211; doi:10.1038/s41467-020-14886-w), 2020-03-06
Supplement: 41467_2020_14886_MOESM4_ESM.pdf [file 41467_2020_14886_MOESM4_ESM.pdf]

## Source Data File

### Source Data to Supplementary Figure 8C

20121219 incubation of t26e.jpg

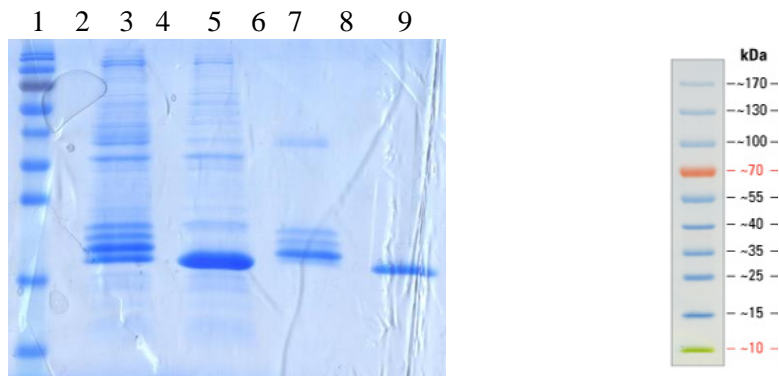

Lanes from left to right:

- 1) Marker: Thermo Scientific™ PageRuler™ Prestained 10-180kDa Protein Ladder
- 2) (empty)
- 3) T4L S44pAcF I150C, 0 hrs
- 4) (empty)
- 5) T4L S44pAcF I150C, 2 hrs
- 6) (empty)
- 7) T4L N55pAcF N132C, 0 hrs
- 8) (empty)
- 9) T4L N55pAcF N132C, 2hrs
